# Supplementary material for: Activation of Coronary Arteriolar PKCβ2 Impairs Endothelial NO-Mediated Vasodilation: Role of JNK/Rho Kinase Signaling and Xanthine Oxidase Activation
Source: MDPI journal article supplement (doi:10.3390/ijms22189763), 2021-09-09
Supplement: s1 [file s1]

Figure S1: Effect of PDBu on vasodilation to sodium nitroprusside.

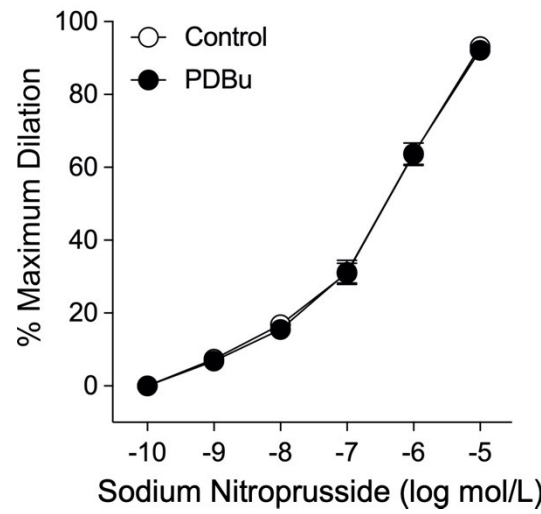

**Figure S1.** The dilation of coronary arterioles in response to sodium nitroprusside was examined before and after incubation with 1 nmol/L PDBu for 60 minutes. The vasodilator response to sodium nitroprusside was not altered by PDBu (n=5, two-way repeated measures ANOVA). n = number of vessels.
